# Supplementary material
Source: publisher figshare collection journal article supplement (https://sage.figshare.com/ndownloader/files/13802645)
Supplement: Supplementary file 1 [file 13802645]

**S1Table** . **Indication for surgery in the adenomyosis group (n=60) and in the control (n=20) group.**

|  | ADE (-)  n=20 | ADE (+)  n=60 |
| --- | --- | --- |
| Indications for surgery, n (%) |  |  |
| Endometriosis | 16 (80) | 48 (80) |
| Benign ovarian cyst | 1 (5) | 1 (1.7) |
| Leiomyomas | 1 (5) | 3 (5) |
| Pelvic pain exploration | 2 (10) | 7 (11.7) |
| Tubal sterility | 0 (0) | 1 (1.7) |

ADE, Adenomyosis; ADE (-), women without adenomyosis; ADE (+), adenomyosis-affected women
